# Supplementary material for: Investigating brain cortical activity in patients with post-COVID-19 brain fog
Source: PubMed Central journal article supplement (PMC9947499; doi:10.3389/fnins.2023.1019778), 2023-02-09
Supplement: Table_1.pdf [file Table_1.pdf]

**1 Appendix A - Supplementary material for “Investigating brain cortical activity in patients with post-COVID-19 brain fog.”**

|    | Lag    | CCF  |
|----|--------|------|
| 1  | -10.00 | 0.44 |
| 2  | -9.00  | 0.48 |
| 3  | -8.00  | 0.52 |
| 4  | -7.00  | 0.56 |
| 5  | -6.00  | 0.60 |
| 6  | -5.00  | 0.65 |
| 7  | -4.00  | 0.69 |
| 8  | -3.00  | 0.73 |
| 9  | -2.00  | 0.77 |
| 10 | -1.00  | 0.81 |
| 11 | 0.00   | 0.84 |
| 12 | 1.00   | 0.84 |
| 13 | 2.00   | 0.83 |
| 14 | 3.00   | 0.82 |
| 15 | 4.00   | 0.81 |
| 16 | 5.00   | 0.80 |
| 17 | 6.00   | 0.78 |
| 18 | 7.00   | 0.77 |
| 19 | 8.00   | 0.75 |
| 20 | 9.00   | 0.73 |
| 21 | 10.00  | 0.72 |

Table 1: Face Recognition - known faces. Electrode E99. Cross-Correlation results between the sub-cohorts A and C. Lag length 4 ms.

|    | Lag    | CCF  |
|----|--------|------|
| 1  | -10.00 | 0.51 |
| 2  | -9.00  | 0.55 |
| 3  | -8.00  | 0.60 |
| 4  | -7.00  | 0.66 |
| 5  | -6.00  | 0.71 |
| 6  | -5.00  | 0.77 |
| 7  | -4.00  | 0.82 |
| 8  | -3.00  | 0.87 |
| 9  | -2.00  | 0.91 |
| 10 | -1.00  | 0.94 |
| 11 | 0.00   | 0.96 |
| 12 | 1.00   | 0.94 |
| 13 | 2.00   | 0.91 |
| 14 | 3.00   | 0.87 |
| 15 | 4.00   | 0.82 |
| 16 | 5.00   | 0.77 |
| 17 | 6.00   | 0.71 |
| 18 | 7.00   | 0.65 |
| 19 | 8.00   | 0.59 |
| 20 | 9.00   | 0.54 |
| 21 | 10.00  | 0.48 |

Table 2: Face Recognition - known faces. Electrode E150. Cross-Correlation results between the sub-cohorts A and B. Lag length 4 ms.

|    | Lag    | CCF  |
|----|--------|------|
| 1  | -10.00 | 0.78 |
| 2  | -9.00  | 0.79 |
| 3  | -8.00  | 0.80 |
| 4  | -7.00  | 0.81 |
| 5  | -6.00  | 0.82 |
| 6  | -5.00  | 0.83 |
| 7  | -4.00  | 0.83 |
| 8  | -3.00  | 0.84 |
| 9  | -2.00  | 0.84 |
| 10 | -1.00  | 0.84 |
| 11 | 0.00   | 0.84 |
| 12 | 1.00   | 0.82 |
| 13 | 2.00   | 0.79 |
| 14 | 3.00   | 0.76 |
| 15 | 4.00   | 0.73 |
| 16 | 5.00   | 0.70 |
| 17 | 6.00   | 0.67 |
| 18 | 7.00   | 0.64 |
| 19 | 8.00   | 0.61 |
| 20 | 9.00   | 0.58 |
| 21 | 10.00  | 0.55 |

Table 3: Face Recognition - known faces. Electrode E100. Cross-Correlation results between the sub-cohorts B and C. Lag length 4 ms.

|    | Lag    | CCF  |
|----|--------|------|
| 1  | -10.00 | 0.70 |
| 2  | -9.00  | 0.71 |
| 3  | -8.00  | 0.73 |
| 4  | -7.00  | 0.75 |
| 5  | -6.00  | 0.77 |
| 6  | -5.00  | 0.80 |
| 7  | -4.00  | 0.82 |
| 8  | -3.00  | 0.84 |
| 9  | -2.00  | 0.87 |
| 10 | -1.00  | 0.89 |
| 11 | 0.00   | 0.91 |
| 12 | 1.00   | 0.89 |
| 13 | 2.00   | 0.87 |
| 14 | 3.00   | 0.85 |
| 15 | 4.00   | 0.83 |
| 16 | 5.00   | 0.81 |
| 17 | 6.00   | 0.79 |
| 18 | 7.00   | 0.77 |
| 19 | 8.00   | 0.75 |
| 20 | 9.00   | 0.73 |
| 21 | 10.00  | 0.71 |

Table 4: Face Recognition - unknown faces. Electrode E100. Cross-Correlation results between the sub-cohorts A and C. Lag length 4 ms.

|    | Lag    | CCF  |
|----|--------|------|
| 1  | -10.00 | 0.83 |
| 2  | -9.00  | 0.84 |
| 3  | -8.00  | 0.85 |
| 4  | -7.00  | 0.86 |
| 5  | -6.00  | 0.87 |
| 6  | -5.00  | 0.89 |
| 7  | -4.00  | 0.90 |
| 8  | -3.00  | 0.91 |
| 9  | -2.00  | 0.93 |
| 10 | -1.00  | 0.94 |
| 11 | 0.00   | 0.95 |
| 12 | 1.00   | 0.93 |
| 13 | 2.00   | 0.92 |
| 14 | 3.00   | 0.90 |
| 15 | 4.00   | 0.87 |
| 16 | 5.00   | 0.85 |
| 17 | 6.00   | 0.82 |
| 18 | 7.00   | 0.79 |
| 19 | 8.00   | 0.76 |
| 20 | 9.00   | 0.73 |
| 21 | 10.00  | 0.70 |

Table 5: Face Recognition - unknown faces. Electrode E100. Cross-Correlation results between the sub-cohorts A and B. Lag length 4 ms.

|    | Lag    | CCF  |
|----|--------|------|
| 1  | -10.00 | 0.69 |
| 2  | -9.00  | 0.70 |
| 3  | -8.00  | 0.71 |
| 4  | -7.00  | 0.72 |
| 5  | -6.00  | 0.73 |
| 6  | -5.00  | 0.74 |
| 7  | -4.00  | 0.75 |
| 8  | -3.00  | 0.76 |
| 9  | -2.00  | 0.78 |
| 10 | -1.00  | 0.80 |
| 11 | 0.00   | 0.82 |
| 12 | 1.00   | 0.80 |
| 13 | 2.00   | 0.78 |
| 14 | 3.00   | 0.76 |
| 15 | 4.00   | 0.73 |
| 16 | 5.00   | 0.70 |
| 17 | 6.00   | 0.68 |
| 18 | 7.00   | 0.65 |
| 19 | 8.00   | 0.62 |
| 20 | 9.00   | 0.60 |
| 21 | 10.00  | 0.57 |

Table 6: Face Recognition - unknown faces. Electrode E100. Cross-Correlation results between the sub-cohorts B and C. Lag length 4 ms.

|    | Lag    | CCF  |
|----|--------|------|
| 1  | -10.00 | 0.67 |
| 2  | -9.00  | 0.69 |
| 3  | -8.00  | 0.71 |
| 4  | -7.00  | 0.73 |
| 5  | -6.00  | 0.76 |
| 6  | -5.00  | 0.79 |
| 7  | -4.00  | 0.81 |
| 8  | -3.00  | 0.84 |
| 9  | -2.00  | 0.87 |
| 10 | -1.00  | 0.89 |
| 11 | 0.00   | 0.91 |
| 12 | 1.00   | 0.89 |
| 13 | 2.00   | 0.87 |
| 14 | 3.00   | 0.86 |
| 15 | 4.00   | 0.84 |
| 16 | 5.00   | 0.83 |
| 17 | 6.00   | 0.81 |
| 18 | 7.00   | 0.79 |
| 19 | 8.00   | 0.77 |
| 20 | 9.00   | 0.75 |
| 21 | 10.00  | 0.73 |

Table 7: Face Recognition - unknown faces. Electrode E99. Cross-Correlation results between the sub-cohorts A and C. Lag length 4 ms.

|    | Lag    | CCF  |
|----|--------|------|
| 1  | -10.00 | 0.82 |
| 2  | -9.00  | 0.83 |
| 3  | -8.00  | 0.84 |
| 4  | -7.00  | 0.86 |
| 5  | -6.00  | 0.87 |
| 6  | -5.00  | 0.89 |
| 7  | -4.00  | 0.90 |
| 8  | -3.00  | 0.92 |
| 9  | -2.00  | 0.93 |
| 10 | -1.00  | 0.94 |
| 11 | 0.00   | 0.95 |
| 12 | 1.00   | 0.94 |
| 13 | 2.00   | 0.92 |
| 14 | 3.00   | 0.90 |
| 15 | 4.00   | 0.87 |
| 16 | 5.00   | 0.84 |
| 17 | 6.00   | 0.81 |
| 18 | 7.00   | 0.78 |
| 19 | 8.00   | 0.75 |
| 20 | 9.00   | 0.72 |
| 21 | 10.00  | 0.69 |

Table 8: Face Recognition - unknown faces. Electrode E101. Cross-Correlation results between the sub-cohorts A and B. Lag length 4 ms.

|    | Lag    | CCF   |
|----|--------|-------|
| 1  | -10.00 | -0.28 |
| 2  | -9.00  | -0.30 |
| 3  | -8.00  | -0.31 |
| 4  | -7.00  | -0.33 |
| 5  | -6.00  | -0.35 |
| 6  | -5.00  | -0.36 |
| 7  | -4.00  | -0.38 |
| 8  | -3.00  | -0.39 |
| 9  | -2.00  | -0.41 |
| 10 | -1.00  | -0.42 |
| 11 | 0.00   | -0.43 |
| 12 | 1.00   | -0.42 |
| 13 | 2.00   | -0.42 |
| 14 | 3.00   | -0.42 |
| 15 | 4.00   | -0.42 |
| 16 | 5.00   | -0.42 |
| 17 | 6.00   | -0.42 |
| 18 | 7.00   | -0.42 |
| 19 | 8.00   | -0.42 |
| 20 | 9.00   | -0.42 |
| 21 | 10.00  | -0.42 |

Table 9: Digit Span - wrong answers. Electrode E138. Cross-Correlation results between the sub-cohorts A and C. Lag length 4 ms.

|    | Lag    | CCF  |
|----|--------|------|
| 1  | -10.00 | 0.31 |
| 2  | -9.00  | 0.31 |
| 3  | -8.00  | 0.30 |
| 4  | -7.00  | 0.30 |
| 5  | -6.00  | 0.29 |
| 6  | -5.00  | 0.29 |
| 7  | -4.00  | 0.28 |
| 8  | -3.00  | 0.28 |
| 9  | -2.00  | 0.27 |
| 10 | -1.00  | 0.27 |
| 11 | 0.00   | 0.26 |
| 12 | 1.00   | 0.24 |
| 13 | 2.00   | 0.22 |
| 14 | 3.00   | 0.19 |
| 15 | 4.00   | 0.17 |
| 16 | 5.00   | 0.14 |
| 17 | 6.00   | 0.11 |
| 18 | 7.00   | 0.09 |
| 19 | 8.00   | 0.07 |
| 20 | 9.00   | 0.05 |
| 21 | 10.00  | 0.02 |

Table 10: Digit Span - wrong answers. Electrode E151. Cross-Correlation results between the sub-cohorts A and B. Lag length 4 ms.

|    | Lag    | CCF   |
|----|--------|-------|
| 1  | -10.00 | -0.61 |
| 2  | -9.00  | -0.62 |
| 3  | -8.00  | -0.62 |
| 4  | -7.00  | -0.63 |
| 5  | -6.00  | -0.64 |
| 6  | -5.00  | -0.65 |
| 7  | -4.00  | -0.66 |
| 8  | -3.00  | -0.67 |
| 9  | -2.00  | -0.68 |
| 10 | -1.00  | -0.69 |
| 11 | 0.00   | -0.71 |
| 12 | 1.00   | -0.70 |
| 13 | 2.00   | -0.69 |
| 14 | 3.00   | -0.68 |
| 15 | 4.00   | -0.67 |
| 16 | 5.00   | -0.66 |
| 17 | 6.00   | -0.65 |
| 18 | 7.00   | -0.63 |
| 19 | 8.00   | -0.62 |
| 20 | 9.00   | -0.62 |
| 21 | 10.00  | -0.61 |

Table 11: Digit Span - wrong answers. Electrode E150. Cross-Correlation results between the sub-cohorts B and C. Lag length 4 ms.

|    | Lag    | CCF  |
|----|--------|------|
| 1  | -10.00 | 0.10 |
| 2  | -9.00  | 0.15 |
| 3  | -8.00  | 0.20 |
| 4  | -7.00  | 0.25 |
| 5  | -6.00  | 0.30 |
| 6  | -5.00  | 0.34 |
| 7  | -4.00  | 0.37 |
| 8  | -3.00  | 0.41 |
| 9  | -2.00  | 0.43 |
| 10 | -1.00  | 0.46 |
| 11 | 0.00   | 0.48 |
| 12 | 1.00   | 0.50 |
| 13 | 2.00   | 0.52 |
| 14 | 3.00   | 0.53 |
| 15 | 4.00   | 0.54 |
| 16 | 5.00   | 0.54 |
| 17 | 6.00   | 0.54 |
| 18 | 7.00   | 0.53 |
| 19 | 8.00   | 0.52 |
| 20 | 9.00   | 0.50 |
| 21 | 10.00  | 0.49 |

Table 12: Task Switching - digits shown. Electrode E129. Cross-Correlation results between the sub-cohorts A and C. Lag length 4 ms.

|    | Lag    | CCF   |
|----|--------|-------|
| 1  | -10.00 | -0.00 |
| 2  | -9.00  | 0.04  |
| 3  | -8.00  | 0.09  |
| 4  | -7.00  | 0.13  |
| 5  | -6.00  | 0.18  |
| 6  | -5.00  | 0.22  |
| 7  | -4.00  | 0.26  |
| 8  | -3.00  | 0.30  |
| 9  | -2.00  | 0.34  |
| 10 | -1.00  | 0.38  |
| 11 | 0.00   | 0.41  |
| 12 | 1.00   | 0.43  |
| 13 | 2.00   | 0.45  |
| 14 | 3.00   | 0.47  |
| 15 | 4.00   | 0.48  |
| 16 | 5.00   | 0.49  |
| 17 | 6.00   | 0.49  |
| 18 | 7.00   | 0.48  |
| 19 | 8.00   | 0.48  |
| 20 | 9.00   | 0.47  |
| 21 | 10.00  | 0.46  |

Table 13: Task Switching - digits shown. Electrode E129. Cross-Correlation results between the sub-cohorts A and B. Lag length 4 ms.

|    | Lag    | CCF  |
|----|--------|------|
| 1  | -10.00 | 0.18 |
| 2  | -9.00  | 0.23 |
| 3  | -8.00  | 0.28 |
| 4  | -7.00  | 0.33 |
| 5  | -6.00  | 0.38 |
| 6  | -5.00  | 0.42 |
| 7  | -4.00  | 0.46 |
| 8  | -3.00  | 0.50 |
| 9  | -2.00  | 0.53 |
| 10 | -1.00  | 0.55 |
| 11 | 0.00   | 0.56 |
| 12 | 1.00   | 0.56 |
| 13 | 2.00   | 0.56 |
| 14 | 3.00   | 0.54 |
| 15 | 4.00   | 0.52 |
| 16 | 5.00   | 0.50 |
| 17 | 6.00   | 0.46 |
| 18 | 7.00   | 0.43 |
| 19 | 8.00   | 0.39 |
| 20 | 9.00   | 0.35 |
| 21 | 10.00  | 0.31 |

Table 14: Task Switching - digits shown. Electrode E152. Cross-Correlation results between the sub-cohorts A and B. Lag length 4 ms.



|    | Lag    | CCF  |
|----|--------|------|
| 1  | -10.00 | 0.56 |
| 2  | -9.00  | 0.59 |
| 3  | -8.00  | 0.62 |
| 4  | -7.00  | 0.65 |
| 5  | -6.00  | 0.67 |
| 6  | -5.00  | 0.70 |
| 7  | -4.00  | 0.72 |
| 8  | -3.00  | 0.75 |
| 9  | -2.00  | 0.76 |
| 10 | -1.00  | 0.77 |
| 11 | 0.00   | 0.78 |
| 12 | 1.00   | 0.78 |
| 13 | 2.00   | 0.77 |
| 14 | 3.00   | 0.76 |
| 15 | 4.00   | 0.74 |
| 16 | 5.00   | 0.73 |
| 17 | 6.00   | 0.71 |
| 18 | 7.00   | 0.68 |
| 19 | 8.00   | 0.66 |
| 20 | 9.00   | 0.64 |
| 21 | 10.00  | 0.62 |

Table 15: Task Switching - digits shown. Electrode E149. Cross-Correlation results between the sub-cohorts B and C. Lag length 4 ms.

|    | Lag    | ACF  |
|----|--------|------|
| 1  | -10.00 | 0.85 |
| 2  | -9.00  | 0.86 |
| 3  | -8.00  | 0.87 |
| 4  | -7.00  | 0.89 |
| 5  | -6.00  | 0.90 |
| 6  | -5.00  | 0.91 |
| 7  | -4.00  | 0.92 |
| 8  | -3.00  | 0.93 |
| 9  | -2.00  | 0.94 |
| 10 | -1.00  | 0.95 |
| 11 | 0.00   | 0.95 |
| 12 | 1.00   | 0.95 |
| 13 | 2.00   | 0.95 |
| 14 | 3.00   | 0.94 |
| 15 | 4.00   | 0.93 |
| 16 | 5.00   | 0.92 |
| 17 | 6.00   | 0.90 |
| 18 | 7.00   | 0.89 |
| 19 | 8.00   | 0.88 |
| 20 | 9.00   | 0.87 |
| 21 | 10.00  | 0.86 |

Table 16: Task Switching - letters shown. Electrode E101. Cross-Correlation results between the sub-cohorts A and C. Lag length 4 ms.

|    | Lag    | ACF  |
|----|--------|------|
| 1  | -10.00 | 0.84 |
| 2  | -9.00  | 0.84 |
| 3  | -8.00  | 0.85 |
| 4  | -7.00  | 0.86 |
| 5  | -6.00  | 0.87 |
| 6  | -5.00  | 0.88 |
| 7  | -4.00  | 0.88 |
| 8  | -3.00  | 0.89 |
| 9  | -2.00  | 0.90 |
| 10 | -1.00  | 0.90 |
| 11 | 0.00   | 0.91 |
| 12 | 1.00   | 0.90 |
| 13 | 2.00   | 0.88 |
| 14 | 3.00   | 0.87 |
| 15 | 4.00   | 0.85 |
| 16 | 5.00   | 0.84 |
| 17 | 6.00   | 0.82 |
| 18 | 7.00   | 0.80 |
| 19 | 8.00   | 0.78 |
| 20 | 9.00   | 0.77 |
| 21 | 10.00  | 0.75 |

Table 17: Task Switching - letters shown. Electrode E126. Cross-Correlation results between the sub-cohorts A and B. Lag length 4 ms.

|    | Lag    | ACF  |
|----|--------|------|
| 1  | -10.00 | 0.71 |
| 2  | -9.00  | 0.71 |
| 3  | -8.00  | 0.71 |
| 4  | -7.00  | 0.72 |
| 5  | -6.00  | 0.73 |
| 6  | -5.00  | 0.74 |
| 7  | -4.00  | 0.75 |
| 8  | -3.00  | 0.75 |
| 9  | -2.00  | 0.76 |
| 10 | -1.00  | 0.76 |
| 11 | 0.00   | 0.76 |
| 12 | 1.00   | 0.74 |
| 13 | 2.00   | 0.73 |
| 14 | 3.00   | 0.71 |
| 15 | 4.00   | 0.69 |
| 16 | 5.00   | 0.67 |
| 17 | 6.00   | 0.65 |
| 18 | 7.00   | 0.63 |
| 19 | 8.00   | 0.61 |
| 20 | 9.00   | 0.59 |
| 21 | 10.00  | 0.57 |

Table 18: Task Switching - letters shown. Electrode E137. Cross-Correlation results between the sub-cohorts B and C. Lag length 4 ms.
